# Supplementary material
Source: PubMed Central journal article supplement (PMC5418062)

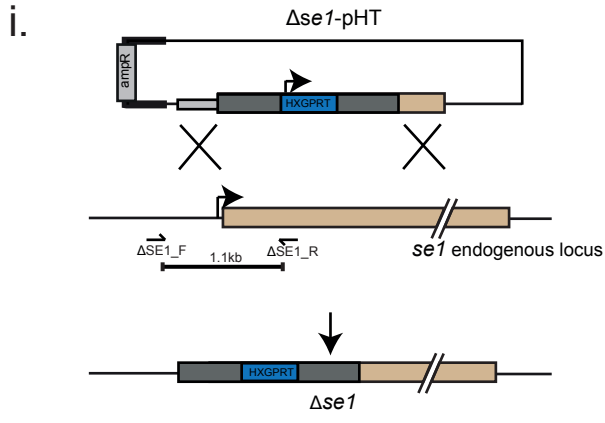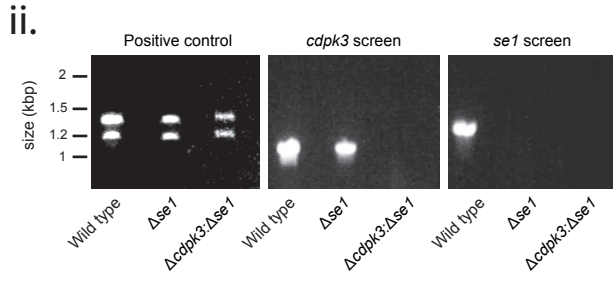

Supplement: 10.1074_M117.775114_jbc.M117.775114-2.pdf [file 10.1074_M117.775114_jbc.M117.775114-2.pdf]
